# Supplementary material for: Disulfide bond-based self-crosslinked carbon-dots for turn-on fluorescence imaging of GSH in living cells
Source: Royal Society of Chemistry journal article supplement (doi:10.1039/d0an00071j), 2020-01-01
Supplement: d0an00071j1.pdf [file d0an00071j1.pdf]

## Supporting Information

### **Disulfide bond-based self-crosslinked carbon-dots for turn-on fluorescence imaging of GSH in living cells**

Jia Li,<sup>a,b</sup> Yuhui Wang,<sup>b,\*</sup> Shan Sun,<sup>b</sup> A-Man Lv,<sup>b</sup> Kai Jiang,<sup>b</sup> Yike Li,<sup>a,\*</sup> Zhongjun Li,<sup>a</sup> and Hengwei Lin<sup>b,\*</sup>

<sup>a</sup> College of Chemistry, Zhengzhou University, Zhengzhou, 450001, PR China

<sup>b</sup> Ningbo Institute of Materials Technology & Engineering, Chinese Academy of Sciences, Ningbo 315201, PR China

\* Corresponding author: wangyuhui@nimte.ac.cn (Y. W), liyike@zzu.edu.cn (Y. L) and linhengwei@nimte.ac.cn (H. L)

## Supplementary Figures and Tables

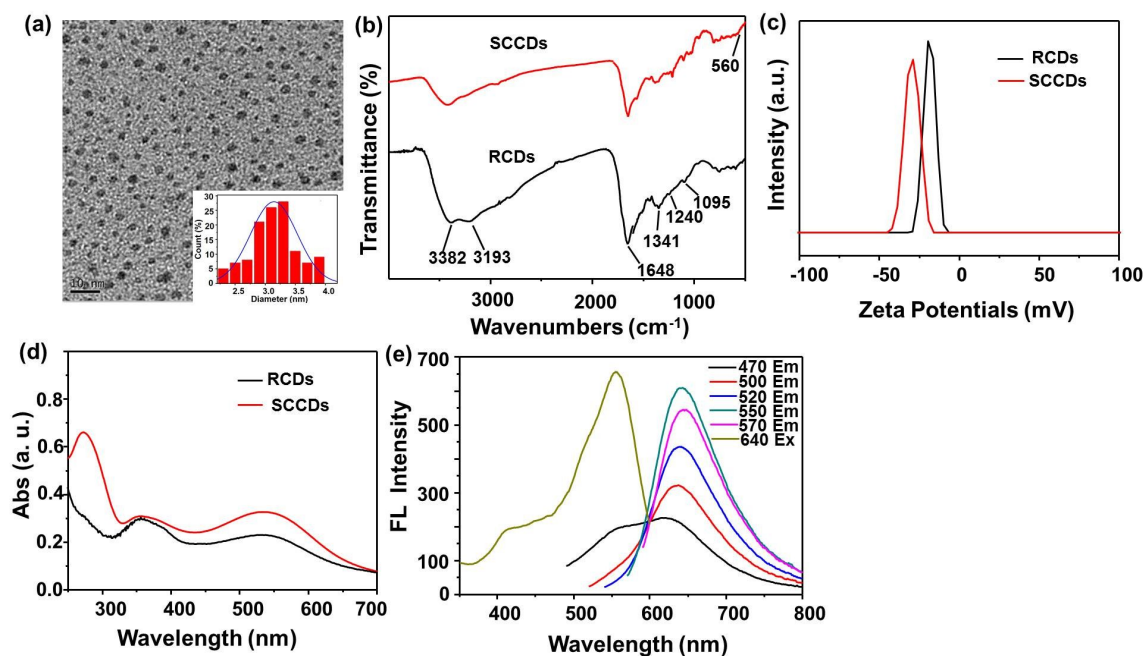

**Fig. S1.** (a) TEM image of the RCDs (inset: diameter distribution). (b) FTIR spectra of the RCDs and the SCCDs. (c) Zeta potentials of the RCDs and the SCCDs. (d) UV-vis absorption spectra of the RCDs and the SCCDs. (e) Fluorescence excitation and emission spectra of the RCDs in PB buffer (10 mM, pH. 7.4).

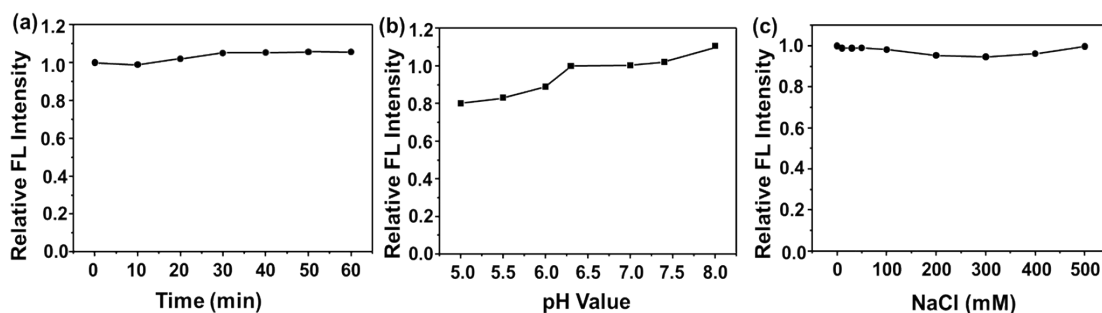

**Fig. S2.** (a) Photostability of the RCDs under continuous irradiation of a ultraviolet lamp. Normalized fluorescence intensities of the RCDs under different pH values (b)

and ionic strengths (c). All the normalized fluorescence intensities were measured at 640 nm under the excitation of 550 nm. The concentration of RCDs is 20  $\mu\text{g/mL}$ .

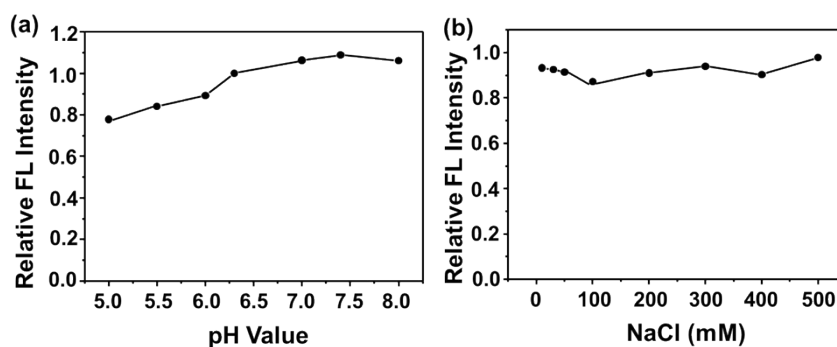

**Fig. S3.** Normalized fluorescence intensities of the SCCDs under different pH values (a) and ionic strengths (b). All the normalized fluorescence intensities were measured at 640 nm under the excitation of 550 nm. The concentration of SCCDs is 20  $\mu\text{g/mL}$ .

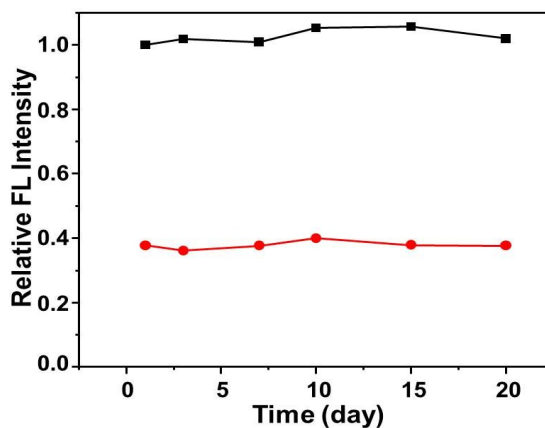

**Fig. S4.** Storage stability of the SCCDs nanoprobe (20  $\mu\text{g/mL}$ ) in the absence (red line) and presence (black line) of GSH (1 mM).

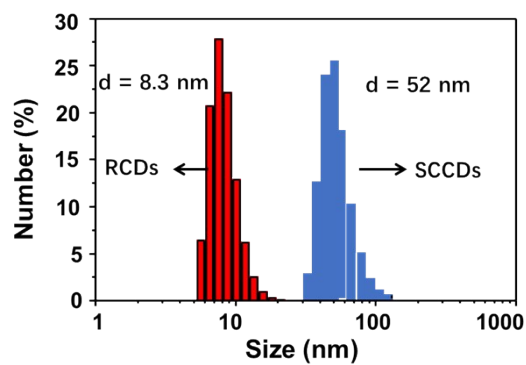

**Fig. S5.** DLS measurements of the RCDs and the SCCDs upon the addition of GSH (1 mM).

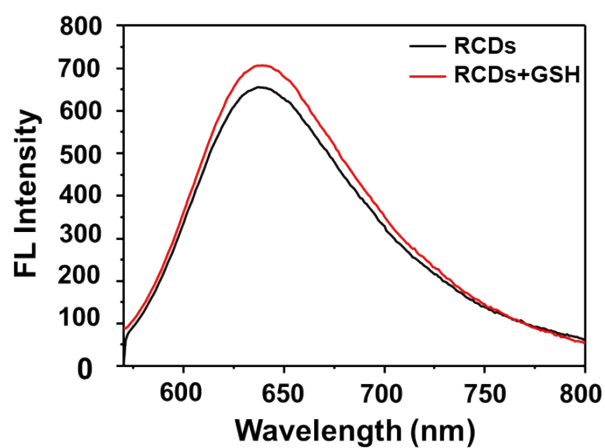

**Fig. S6.** Fluorescence emission spectra of the RCDs (20  $\mu\text{g/mL}$ ) in the absence and presence of GSH (1 mM).

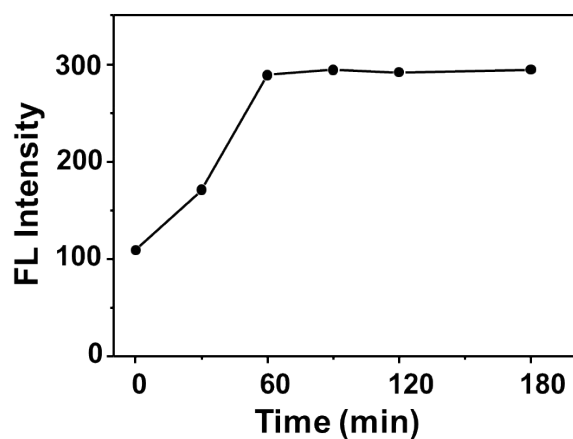

**Fig. S7.** Time course of the fluorescence recovery of the SCCDs nanoprobe (20  $\mu\text{g/mL}$ ) in the presence of GSH (1 mM).

**Table S1.** Absolute quantum yields of the RCDs and the SCCDs using R6G as the internal reference.

| Sample | Solvent          | $\lambda_{\text{ex}}/\text{nm}$ | $\Phi_1/\%$ | $\Phi_2/\%$ | $\Phi_3/\%$ | $\Phi_{\text{average}}/\%$ | $\Phi_{\text{corr.}}/\%$ |
|--------|------------------|---------------------------------|-------------|-------------|-------------|----------------------------|--------------------------|
| R6G    | EtOH             | 488                             | 95.04       | 94.24       | 92.02       | 93.77                      | 95                       |
| RCDs   | H <sub>2</sub> O | 550                             | 8.25        | 7.22        | 8.95        | 8.14                       | 8.25                     |
| SCCDs  | H <sub>2</sub> O | 550                             | 2.11        | 1.84        | 2.32        | 2.09                       | 2.12                     |

**Table S2.** A detailed comparison between previously reported disulfide bond-based luminescent probes and this SCCDs nanoprobe.

| Probe             | LOD ( $\mu\text{M}$ ) | Selectivity | Stability | Preparation | Ref       |
|-------------------|-----------------------|-------------|-----------|-------------|-----------|
| UCPs              | 5                     | Poor        | Yes       | Difficult   | S1        |
| SiNPs-S-S-AuNPs   | 0.5                   | Poor        | No        | Difficult   | S2        |
| AuNCs             | 4                     | Good        | No        | Easy        | S3        |
| S-S-BODIPY-S      | 0.85                  | Good        | Yes       | Difficult   | S4        |
| Bis-Naphthalimide | 2.9                   | Good        | Yes       | Difficult   | S5        |
| DCM               | 24                    | Poor        | No        | Difficult   | S6        |
| Naphthalimide     | 28                    | Poor        | No        | Difficult   | S7        |
| AMC               | 36                    | Poor        | Yes       | Easy        | S8        |
| SCCDs             | 5.7                   | Good        | Yes       | Easy        | This work |

## References

- S1. P.-D. Nguyen, V. T. Cong, S. J. Son, and J. Min, *J. Nanosci. Nanotech.*, 2015, 15, 7950-7954.
- S2. Y. Shi, H. Zhang, Z. Yue, Z. Zhang, K.-S. Teng, M.-J. Li, C. Yi and M. Yang, *Nanotechnology*, 2013, 375501.
- S3. C. Dai, C. Yang and X. Yan, *Nano. Res.*, 2018, 11, 2488-2497.
- S4. F. Wang, L. Zhou, C. Zhao, R. Wang, Q. Fei, S. Luo, Z. Guo, H. Tian and W. Zhu, *Chem. Sci.*, 2015, 6, 2584-2589.
- S5. W. Shen, J. Ge, S. He, R. Zhang, C. Zhao, Y. Fan, S. Yu, B. Liu and Q. Zhu, *Chem. Asia. J.*, 2017, 12, 1532 – 1537.

- S6. X. Wu, A. Shao, S. Zhu, Z. Guo and W. Zhu, *Sci. China. Chem.*, 2016, 59, 62-69.
- S7. B. Zhu, X. Zhang, Y. Li, P. Wang, H. Zhang and X. Zhuang, *Chem. Commun.*, 2010, 46, 5710-5712.
- S8. L. Hu, X. Wei, J. Meng, X. Wang, X. Chen and J. Wang, *Sensor. Actuat. B-Chem.*, 2018, 268, 264-269.
